# Supplementary material for: Marked recent declines in boron in Baltic Sea cod otoliths – a bellwether of incipient acidification in a vast hypoxic system?
Source: Copernicus journal article supplement (doi:10.5194/bg-20-4751-2023), 2023-11-30

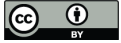

*Supplement of*

## **Marked recent declines in boron in Baltic Sea cod otoliths – a bellwether of incipient acidification in a vast hypoxic system?**

**Karin E. Limburg et al.**

*Correspondence to:* Karin E. Limburg ([klimburg@esf.edu](mailto:klimburg@esf.edu))

The copyright of individual parts of the supplement might differ from the article licence.

**Figure S1.** Principal components plot for first two components for water data, Gotland Deep, 1985-2019.

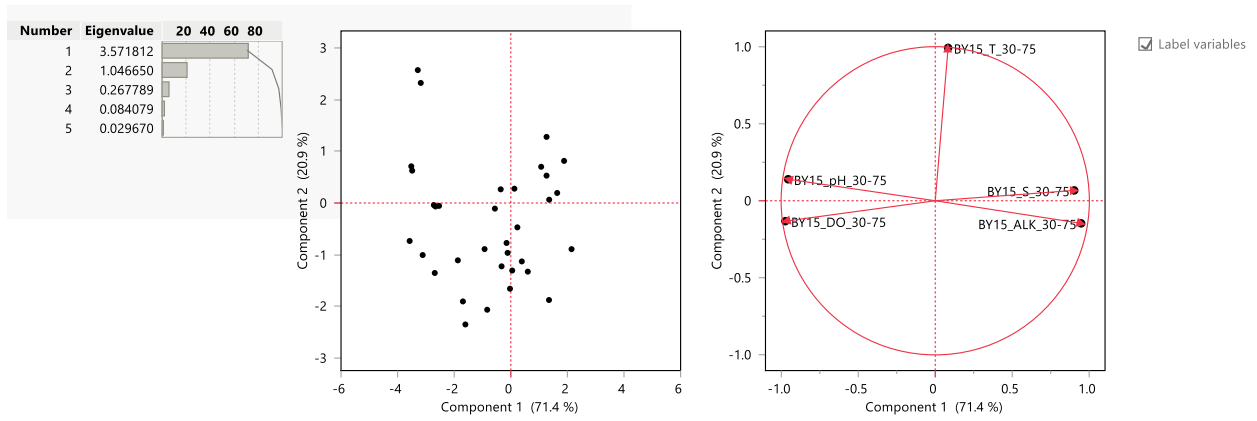

**Figure S2.** Mean annual B:Ca by Age and Decade.

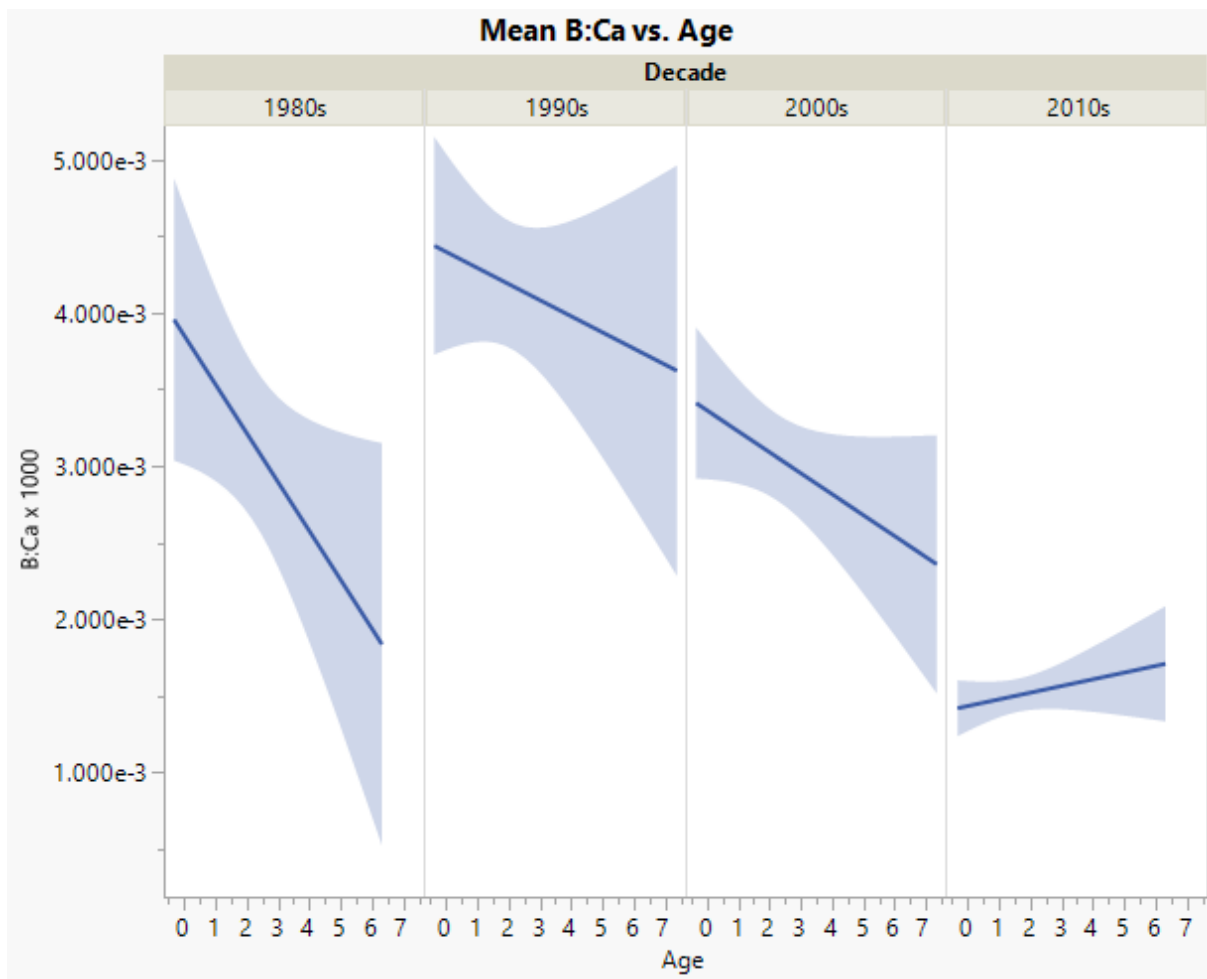

**Figure S3(a).** Plots of statistics for regressions of P:Ca on B:Ca computed for each otolith analyzed. Individual otolith slopes are plotted here as a function of the corresponding  $R^2$  values. Iceland is included as an out-group. Steeper positive slopes with higher  $R^2$  values imply an unknown physiological control on B:Ca, since P:Ca is under physiological control. Dashed horizontal line shows slope = 0.

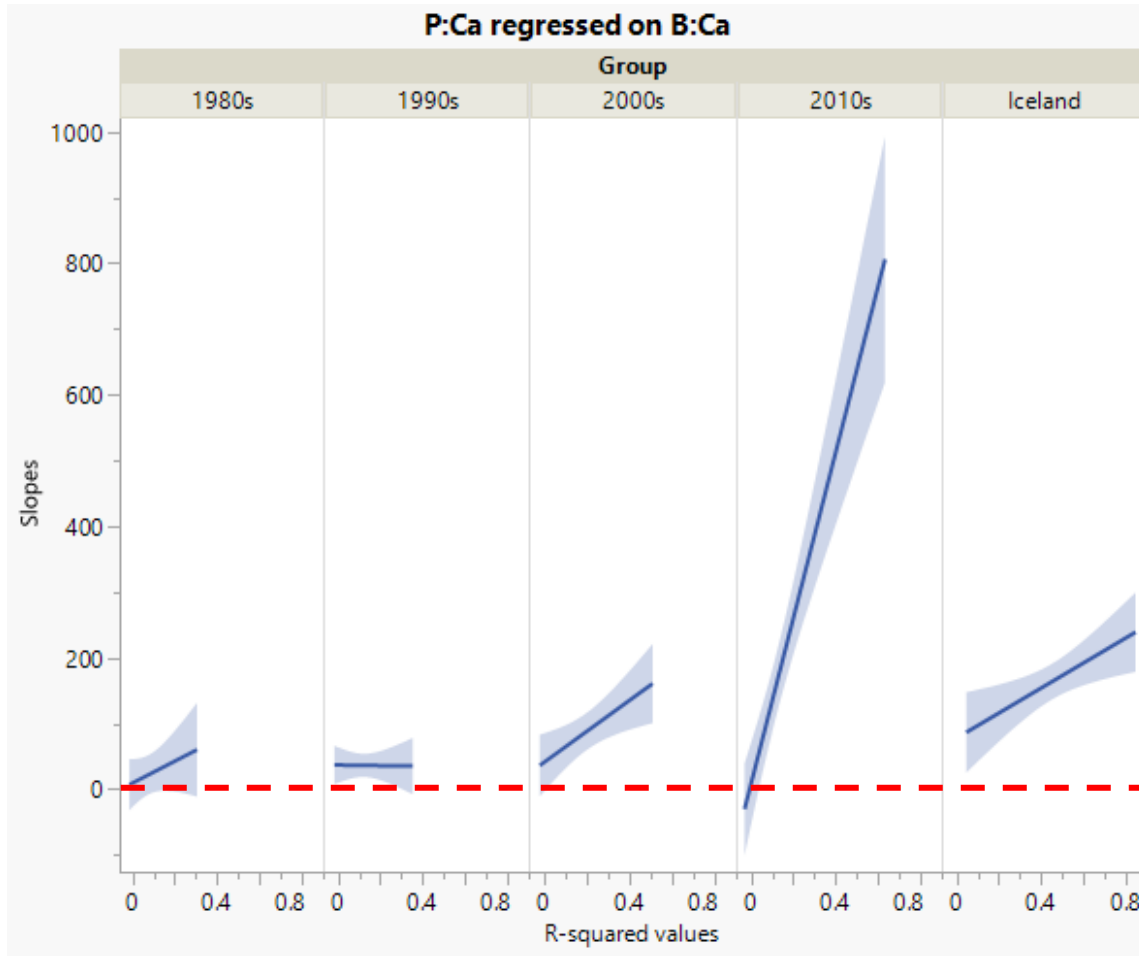

**Figure S3(b).** Box plots of  $R^2$  values of individual fish regressions of P:Ca on B:Ca, by decade.

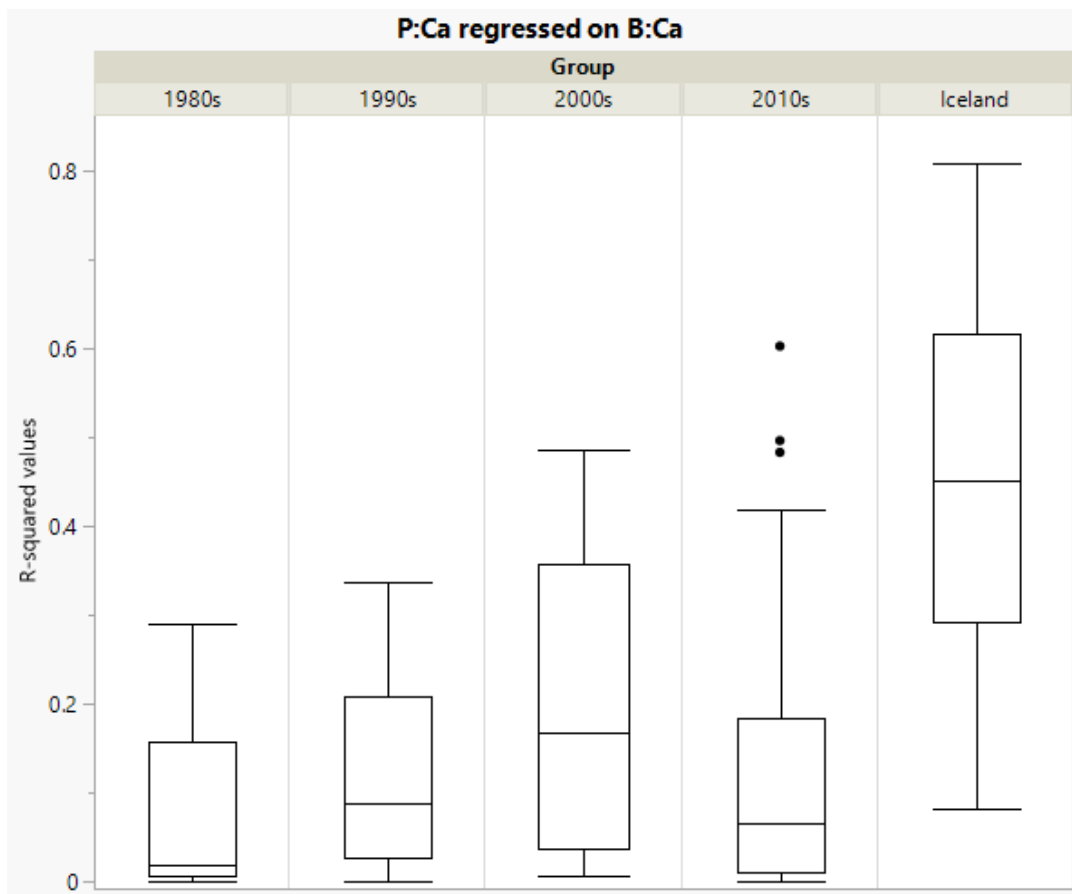

**Figure S4.** Plots of statistics for regressions of Mn:Mg on B:Ca computed for each otolith analyzed. Individual otolith slopes are plotted here as a function of the corresponding  $R^2$  values. Because otolith Mn:Mg serves as a proxy for hypoxia exposure, negative slopes imply that when hypoxia is high, B:Ca is low, which could occur if organic acids are formed during algal bloom decomposition that consumes oxygen. Dashed horizontal line shows slope = 0.

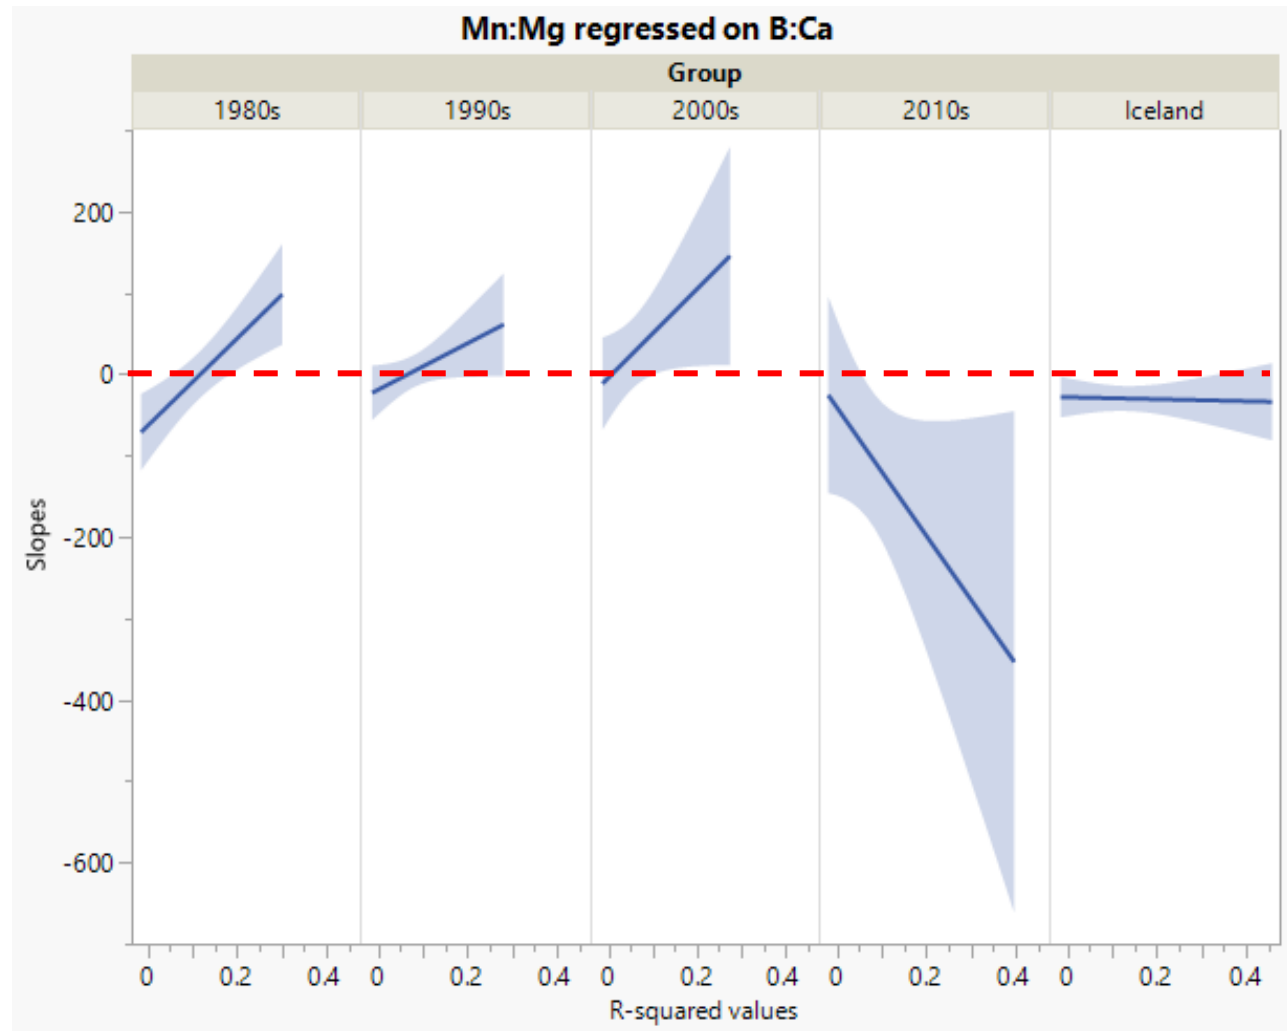

**Figure S5.** Slopes of Mn:Mg regressions on B:Ca computed for each otolith plotted against fish age by decade (with Iceland being an out-group). Dashed horizontal line shows slope = 0.

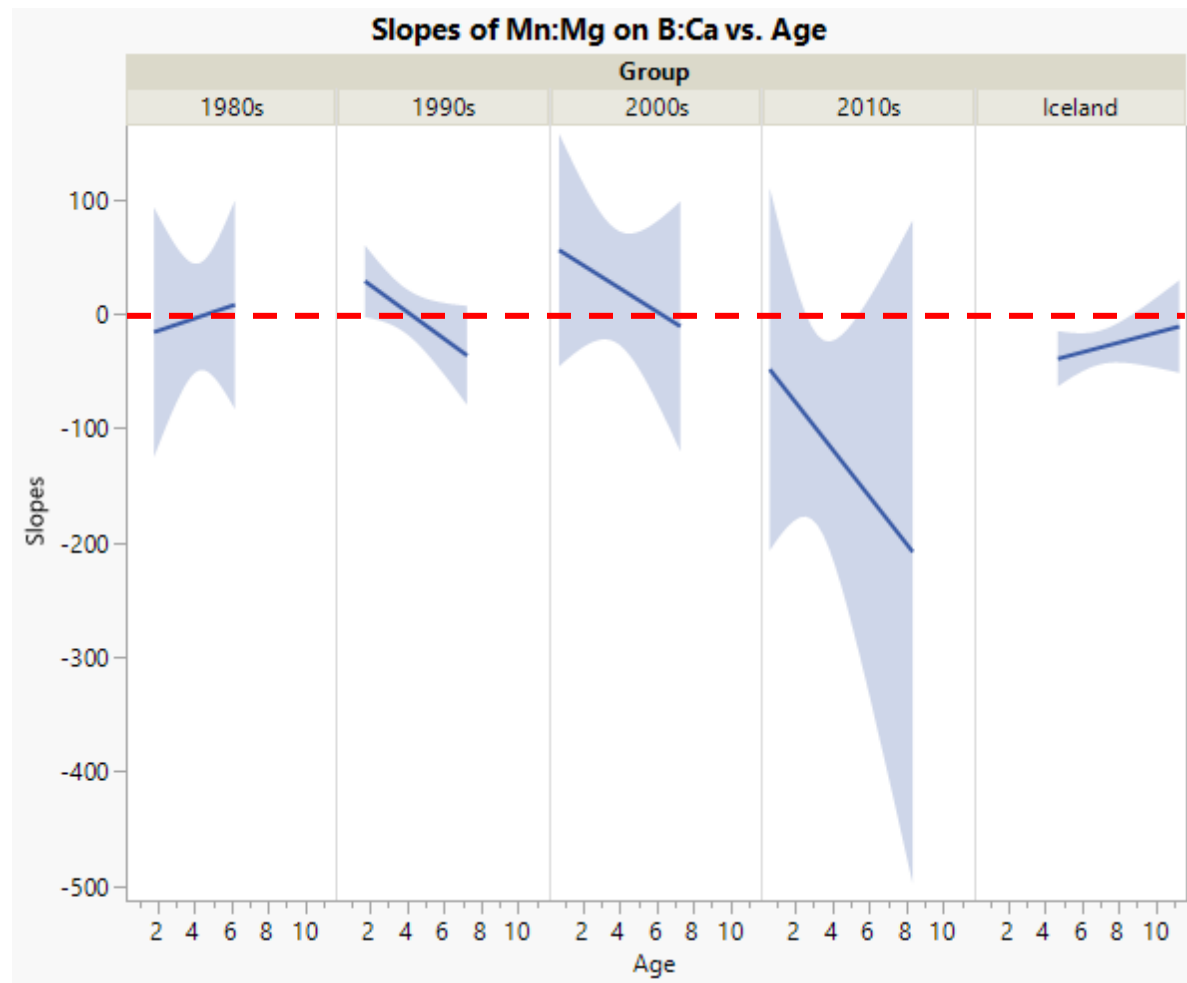

Supplement: Supplementary file 1 [file bg-20-4751-2023-supplement.pdf]
